# Supplementary material
Source: publisher site journal article supplement (https://www.spandidos-publications.com/8583/downloadSupplementary)
Supplement: Supplementary file 1 [file downloadSupplementary]

Table S1. Differentially expressed serum endogenous metabolites in Nor, Cis and MEAG groups.

| Metabolite            | RT,<br>min | Measured<br>m/z | Adduct   | Formula    | Cis vs. Nor |          |                           |       | MEAG vs. Cis |          |                           |       |
|-----------------------|------------|-----------------|----------|------------|-------------|----------|---------------------------|-------|--------------|----------|---------------------------|-------|
|                       |            |                 |          |            | FC          | V        | P-value                   | Trend | FC           | V        | P-value                   | Trend |
| L-phenylalanine       | 1.287 /    | 166.0860 /      | (M+H)+ / | C9H11NO2   | 2.6645 /    | 1.0618 / | 2.8132x10 <sup>-5</sup> / | ↑/↑.  | -1.8279 /    | 1.1342 / | 7.9870x10 <sup>-4</sup> / | ↓/↓.  |
|                       | 1.343      | 164.0715        | (M-H)-   |            | 3.7194      | 1.3234   | 7.0602x10 <sup>-7</sup>   |       | -2.1005      | 1.1563   | 9.3350x10 <sup>-4</sup>   |       |
| L-carnitine           | 0.835      | 162.1128        | (M+H)+   | C7H15NO3   | 3.3979      | 1.0839   | 1.4820x10 <sup>-5</sup>   | ↑     | -2.5086      | 1.1840   | 4.0438x10 <sup>-4</sup>   | ↓     |
| Creatine              | 0.858      | 132.0763        | (M+H)+   | C4H9N3O2   | -3.9873     | 1.1408   | 1.5123x10 <sup>-8</sup>   | ↓     | 2.3159       | 1.2268   | 1.5702x10 <sup>-4</sup>   | ↑     |
| Phosphocholine        | 11.821     | 184.0728        | (M)+     | C5H15NO4P  | 1.6580      | 1.0996   | 5.2402x10 <sup>-6</sup>   | ↑     | -1.0745      | 1.1725   | 2.6454x10 <sup>-4</sup>   | ↓     |
| LysoPE (16:0/0:0)     | 11.727     | 454.2934        | (M+H)+   | C21H44NO7P | -4.0524     | 1.1468   | 5.0280x10 <sup>-9</sup>   | ↓     | 2.0566       | 1.2379   | 1.4216x10 <sup>-4</sup>   | ↑     |
| sStearoyl-L-carnitine | 12.937     | 428.3734        | (M+H)+   | C25H49NO4  | -4.6133     | 1.1197   | 3.3669x10 <sup>-7</sup>   | ↓     | 2.5077       | 1.1712   | 4.1441x10 <sup>-4</sup>   | ↑     |
| L-tryptophan          | 4.118      | 203.0826        | (M-H)-   | C11H12N2O2 | 3.3316      | 1.2970   | 7.2559x10 <sup>-6</sup>   | ↑     | -2.1848      | 1.1798   | 6.7676x10 <sup>-4</sup>   | ↓     |
| Citric acid           | 0.922      | 191.0188        | (M-H)-   | C6H8O7     | 3.5848      | 1.1097   | 1.2978x10 <sup>-3</sup>   | ↑     | -1.5454      | 1.1738   | 5.8196x10 <sup>-4</sup>   | ↓     |
| Ascorbic acid         | 0.919      | 175.0243        | (M-H)-   | C6H8O6     | -3.1022     | 1.0061   | 6.5670x10 <sup>-3</sup>   | ↓     | 2.6874       | 1.2327   | 4.2563x10 <sup>-4</sup>   | ↑     |
| Hyochoic acid         | 6.792      | 407.2796        | (M-H)-   | C24H40O5   | 5.2868      | 1.0319   | 7.4059x10 <sup>-3</sup>   | ↑     | -10.7310     | 1.2635   | 2.0890x10 <sup>-5</sup>   | ↓     |
| Docosahexaenoic acid  | 11.173     | 327.2325        | (M-H)-   | C22H32O2   | -3.4037     | 1.1619   | 4.2741x10 <sup>-4</sup>   | ↓     | 3.6107       | 1.2709   | 2.8350x10 <sup>-5</sup>   | ↑     |
| L-tyrosine            | 1.216      | 180.0660        | (M-H)-   | C9H11NO3   | 5.2108      | 1.2661   | 1.4192x10 <sup>-5</sup>   | ↑     | -3.2157      | 1.1713   | 5.2116x10 <sup>-4</sup>   | ↓     |
| L-pyroglutamic acid   | 0.952      | 128.0350        | (M-H)-   | C5H7NO3    | 3.6354      | 1.3284   | 4.3286x10 <sup>-7</sup>   | ↑     | -1.5794      | 1.0661   | 3.4123x10 <sup>-3</sup>   | ↓     |

LysoPE, lysophosphatidylethanolamine; RT, retention time; measured m/z, measured mass-to-charge ratio; FC, fold change; V, variable importance in projection; Nor, normal control group; Cis, cisplatin group; MEAG, methanolic extract of BaiYangJie. iYangJie. BaiYangJie. iYangJie. atin group; Mrease in the corresponding comparison.

Table SII. Topological properties of core targets.

| No. | Gene name | Degree centrality | Betweenness centrality | Closeness centrality |
|-----|-----------|-------------------|------------------------|----------------------|
| 1   | AKT1      | 117               | 3287.6824              | 0.6923               |
| 2   | EGFR      | 101               | 2511.0270              | 0.6592               |
| 3   | ALB       | 103               | 2134.2258              | 0.6571               |
| 4   | BCL2      | 98                | 2081.5960              | 0.6469               |
| 5   | HIF1A     | 92                | 1869.2987              | 0.6449               |
| 6   | HSP90AA1  | 95                | 1563.5806              | 0.6409               |
| 7   | SRC       | 102               | 1432.9989              | 0.6350               |
| 8   | ESR1      | 93                | 1420.6189              | 0.6311               |
| 9   | PTGS2     | 82                | 1304.1351              | 0.6292               |
| 10  | MAPK3     | 85                | 1108.3928              | 0.6106               |
| 11  | GSK3B     | 73                | 965.2620               | 0.6000               |

For each centrality metric, genes are ranked independently. Thus, the three gene columns list the top-ranked genes for degree centrality, betweenness centrality and closeness centrality, respectively, and row-wise entries are not intended for direct one-to-one comparison.
